# Supplementary material
Source: PubMed Central journal article supplement (PMC4672003)
Supplement: ijbsv11p1458s1.pdf [file ijbsv11p1458s1.pdf]

## Supplementary Materials and Methods

### Intestinal-specific KLF5 knockdown mice generation

C57BL/6 mice carrying *Klf5* alleles flanked by loxP sites (*Klf5<sup>fl/fl</sup>* mice) were described previously (1). C57BL/6 mice carrying the Cre recombinase gene under regulation of the *villin* promoter (*Vil-Cre* mice) were purchased from Model Animal Research Center of Nanjing University (Nanjing, China). *Klf5<sup>fl/fl</sup>* mice were crossed with *Vil-Cre* mice to generate *Vil-Cre; Klf5<sup>fl/+</sup>* progeny. Littermates or age-matched *Vil-Cre; Klf5<sup>fl/-</sup>* mice served as controls. Genomic DNA isolation and PCR were used to confirm the genotypes of the mice used.

### Antibodies

Antibodies used for Western blotting were KLF5 (1:1000, 07-1580, Millipore, Billerica, MA, USA) and GAPDH (1:1,000, 2251-1, Epitomics, Burlingame, CA, USA). Antibodies used for immunohistochemistry were KLF5 (1:500, 07-1580, Millipore, Billerica, MA, USA); Musashi-1 (1:400, ab21628) and Ki67 (1:100, ab16667) from Abcam (Cambridge, MA, USA). Antibodies used for immunofluorescence were guinea pig monoclonal KLF5 antibody (2) and rabbit monoclonal Ki67 (1:100, ab16667, Abcam, Cambridge, MA, USA).

Horseshoe peroxidase-conjugated and FITC-labeled goat-anti rabbit IgG were purchased from Beyotime Institute of Biotechnology (Haimen,

China). Ready-to-use secondary antibody goat-anti rabbit HRP-IgG was purchased from Zhongshan Golden Bridge Biotechnology (Beijing, China). Biotinylated goat-anti guinea pig secondary antibody was purchased from Vector Lab (Burlingame, CA, USA). Cy3-labeled StreptAvidin-Biotin-enzyme Complex was purchased from Wuhan Boster Bio-engineering Co. Ltd. (Wuhan, China).

### **Morphological analysis**

Villus height and crypt depth were determined by taking pictures of H&E-stained sections. The images were analyzed using Image J 1.43 software. At least 30 well-oriented, full-length crypt-villus units per mouse were measured. The measurement in pixels was converted to length in  $\mu\text{m}$  with the following conversion factor: 1.46 pixels per  $\mu\text{m}$ . Crypts per circumference were counted from 3 separate tubular intestinal H&E-stained slices for each mouse.

### **Microarray analysis of gene expression**

Total RNA was extracted from small intestine tissues with Trizol reagent (Invitrogen, Carlsbad, CA, USA) and quantified using a NanoDrop ND-1000 (Thermo Scientific Inc., Waltham, MA, USA). RNA integrity was assessed by standard denaturing agarose gel electrophoresis. Equal mass amounts of total RNA were pooled from each small intestine to yield a sample representing RNA from 3 separate mice in each group. Microarray-based mRNA expression profiling was performed using Roche-NimbleGen (12x135K) microarrays (Roche NimbleGen, Madison,

WI, USA). The microarrays contained approximately 44,170 assay probes corresponding to all of the annotated mouse mRNA sequences (NCBI MM9, Build 37). Total RNA labeling and array hybridization were performed using standard protocols according to the manufacturers' instructions. An Axon GenePix 4000B scanner was used to scan the probe arrays. Data were extracted and normalized using NimbleScan v2.5 software. mRNA with an absolute fold change of 2 or greater was judged to be differentially expressed. Subsequently, hierarchical clustering was performed using Agilent GeneSpring GX software (version 11.5.1). Gene Ontology (GO) analysis and pathway analysis were performed using the standard enrichment computation method.

**Supplemental Results, Figures and Tables**

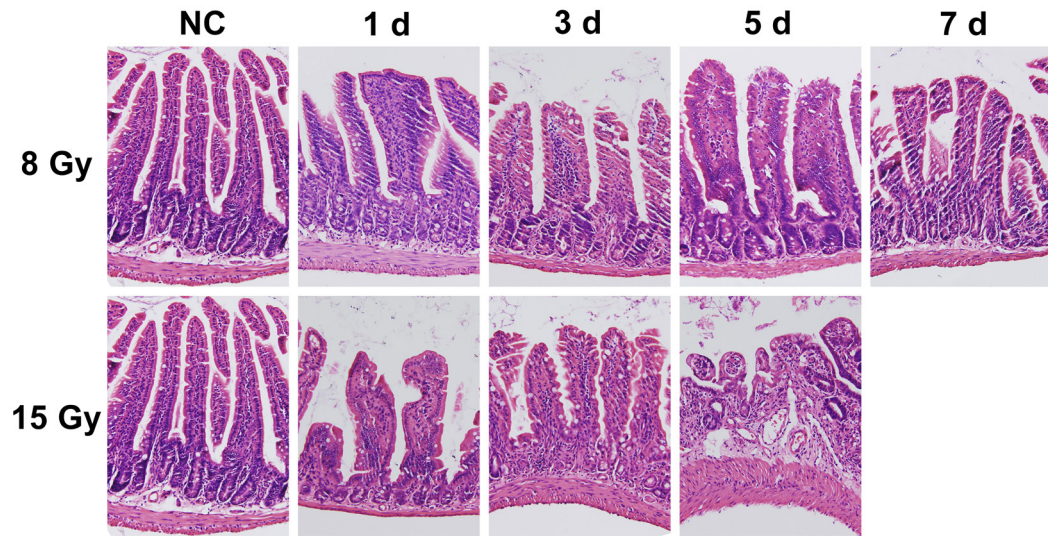

**Figure S1.** Representative H&E staining of paraffin intestinal sections from WT mice non-irradiated or X-irradiated by 8 or 15 Gy at the indicated times (magnification 200×). NC, non-irradiated control.

**Table S1.** Primer sequences for real-time PCR analysis.

| Gene           | Forward primer                   | Reverse primer                |
|----------------|----------------------------------|-------------------------------|
| <i>Rev11</i>   | 5'- GTTCTCTTCCGCCATCCAC -3'      | 5'- GGGGAGGACACTGAACGAC -3'   |
| <i>Usp1</i>    | 5'- TTGCAAGGAGTTGACGAGAAT -3'    | 5'- CACCAGCGATCCCTCTCC -3'    |
| <i>Lig1</i>    | 5'- TGCCTCATTCTGCTCCTCA -3'      | 5'- ACATCTCCCCATCAGGATTC -3'  |
| <i>Xpc</i>     | 5'- TTCCTTAGAGAGCTTTCGGG -3'     | 5'- CGAGGACAACAAAGTAGCCC -3'  |
| <i>Cul4b</i>   | 5'- TTGCAGAAATCTTATGAGAACAAA -3' | 5'- AAAAGAAGCAGTGGAAGCCA -3'  |
| <i>Erc5</i>    | 5'- GCTTGGTTTAGCCAAATGCT -3'     | 5'- CTGTGGAAGCTGCTGGAGTG -3'  |
| <i>Dclre1c</i> | 5'- CTCTTCCTTCTCACCCGAAG -3'     | 5'- CCCAAAGTACAGATTCTGGGA -3' |
| <i>Nhej1</i>   | 5'- CTTGTTTCAGCTCCTTGGCTC -3'    | 5'- ACGGTTATGCCTTGCTGATT -3'  |
| <i>Gapdh</i>   | 5'- CGTCCCGTAGACAAAATGGT -3'     | 5'- TTGATGGCAACAATCTCCAC -3'  |

**Table S2. Numbers of up- and down-regulated genes in small intestines of non-irradiated and irradiated mice at 6 h post 15 Gy TBI (*Vil-Cre; Klf5<sup>fl/+</sup>* mice vs. control mice).**

| Absolute fold<br>change | NC           |                | 6h post 15Gy TBI |                |
|-------------------------|--------------|----------------|------------------|----------------|
|                         | Up-regulated | Down-regulated | Up-regulated     | Down-regulated |
| ≥2 and <5               | 2511         | 4839           | 1046             | 1275           |
| ≥5 and <10              | 583          | 1404           | 47               | 84             |
| ≥10 and <50             | 303          | 1110           | 1                | 13             |
| ≥50                     | 24           | 230            | 0                | 0              |
| Total                   | 3421         | 7583           | 1094             | 1372           |

Note: NC, non-irradiated control.

**Table S3. Genes involved in DNA damage repair pathways that are down-regulated by intestinal-specific knockdown of KLF5 (*Vil-Cre*; *Klf5<sup>fl/+</sup>* mice vs. control mice).**

| Gene name                  | Fold change | Chromosome | Description                                                                           |
|----------------------------|-------------|------------|---------------------------------------------------------------------------------------|
| Nucleotide excision repair |             |            |                                                                                       |
| <i>Rbx1</i>                | -27.52      | chr15      | Ring-box 1                                                                            |
| <i>Ercc5</i>               | -12.61      | chr1       | Excision repair cross-complementing rodent repair deficiency, complementation group 5 |
| <i>Cul4b</i>               | -11.75      | chrX       | Cullin 4B                                                                             |
| <i>Lig1</i>                | -7.08       | chr7       | Ligase I, DNA, ATP-dependent                                                          |
| <i>Rfc3</i>                | -6.25       | chr5       | Replication factor C (activator 1) 3                                                  |
| <i>Xpc</i>                 | -6.06       | chr6       | Xeroderma pigmentosum, complementation group C                                        |
| <i>Cdk7</i>                | -5.69       | chr13      | Cyclin-dependent kinase 7                                                             |
| <i>Rfc1</i>                | -5.24       | chr5       | Replication factor C (activator 1) 1                                                  |
| <i>Pold2</i>               | -4.72       | chr11      | Polymerase (DNA directed), delta 2, regulatory subunit                                |
| <i>Rpa3</i>                | -4.13       | chr6       | Replication protein A3                                                                |
| <i>Gtf2h1</i>              | -3.82       | chr7       | General transcription factor II H, polypeptide 1                                      |
| <i>Gtf2h2</i>              | -3.09       | chr13      | General transcription factor II H, polypeptide 2                                      |

---

|                        |        |       |                                                                                          |
|------------------------|--------|-------|------------------------------------------------------------------------------------------|
| <i>Rpa2</i>            | -2.98  | chr4  | Replication protein A2                                                                   |
| <i>Ddb2</i>            | -2.94  | chr2  | Damage specific DNA binding protein 2                                                    |
| <i>Gtf2h5</i>          | -2.80  | chr17 | General transcription factor II H, polypeptide 5                                         |
| <i>Pold1</i>           | -2.59  | chr7  | Polymerase (DNA directed), delta 1, catalytic subunit                                    |
| <i>Gtf2h4</i>          | -2.57  | chr17 | General transcription factor II H, polypeptide 4                                         |
| <i>Cetn2</i>           | -2.49  | chrX  | Centrin 2                                                                                |
| <i>Cul4a</i>           | -2.42  | chr8  | Cullin 4A                                                                                |
| <i>Ercc4</i>           | -2.29  | chr16 | Excision repair cross-complementing rodent repair deficiency,<br>complementation group 4 |
| <i>Rfc5</i>            | -2.04  | chr5  | Replication factor C (activator 1) 5                                                     |
| Fanconi anemia pathway |        |       |                                                                                          |
| <i>Eme2</i>            | -12.28 | chr17 | Essential meiotic structure-specific endonuclease subunit 2                              |
| <i>Rev1</i>            | -9.41  | chr1  | REV1 homolog                                                                             |
| <i>Poli</i>            | -5.35  | chr18 | Polymerase (DNA directed), iota                                                          |
| <i>Usp1</i>            | -5.10  | chr4  | Ubiquitin specific peptdiase 1                                                           |
| <i>Hes1</i>            | -4.66  | chr16 | Hairy and enhancer of split 1                                                            |
| <i>Telo2</i>           | -4.14  | chr17 | Telomere maintenance 2, homolog                                                          |

---



---

|                      |       |       |                                                                                          |
|----------------------|-------|-------|------------------------------------------------------------------------------------------|
| <i>Rpa3</i>          | -4.13 | chr6  | Replication protein A3                                                                   |
| <i>Fancc</i>         | -3.89 | chr13 | Fanconi anemia, complementation group C                                                  |
| <i>Top3b</i>         | -3.25 | chr16 | Topoisomerase (DNA) III beta                                                             |
| <i>Polk</i>          | -3.17 | chr13 | Polymerase (DNA directed), kappa                                                         |
| <i>Palb2</i>         | -3.16 | chr7  | Partner and localizer of BRCA2                                                           |
| <i>Fancl</i>         | -3.14 | chr7  | Similar to Fanconi anemia, complementation group F                                       |
| <i>Blm</i>           | -3.14 | chr7  | Bloom syndrome homolog                                                                   |
| <i>Rpa2</i>          | -2.98 | chr4  | Replication protein A2                                                                   |
| <i>Fancl</i>         | -2.95 | chr4  | Fanconi anemia complementation group G                                                   |
| <i>Rmi1</i>          | -2.80 | chr13 | RecQ mediated genome instability 1, homolog                                              |
| <i>Fancl</i>         | -2.80 | chr11 | Fanconi anemia, complementation group L                                                  |
| <i>Rad51</i>         | -2.77 | chr2  | RAD51 homolog                                                                            |
| <i>Atrip</i>         | -2.43 | chr9  | ATR interacting protein                                                                  |
| <i>C230052I12Rik</i> | -2.36 | chr7  | RIKEN cDNA C230052I12 gene                                                               |
| <i>Ercc4</i>         | -2.29 | chr16 | Excision repair cross-complementing rodent repair deficiency,<br>complementation group 4 |
| <i>Brcal</i>         | -2.01 | chr11 | Breast cancer 1                                                                          |

Mismatch repair

|              |       |       |                                                        |
|--------------|-------|-------|--------------------------------------------------------|
| <i>Lig1</i>  | -7.08 | chr7  | Ligase I, DNA, ATP-dependent                           |
| <i>Rfc3</i>  | -6.25 | chr5  | Replication factor C (activator 1) 3                   |
| <i>Rfc1</i>  | -5.24 | chr5  | Replication factor C (activator 1) 1                   |
| <i>Mlh3</i>  | -5.02 | chr12 | MutL homolog 3                                         |
| <i>Pold2</i> | -4.72 | chr11 | Polymerase (DNA directed), delta 2, regulatory subunit |
| <i>Rpa3</i>  | -4.13 | chr6  | Replication protein A3                                 |
| <i>Msh2</i>  | -3.95 | chr17 | MutS homolog 2                                         |
| <i>Rpa2</i>  | -2.98 | chr4  | Replication protein A2                                 |
| <i>Pold1</i> | -2.59 | chr7  | Polymerase (DNA directed), delta 1, catalytic subunit  |
| <i>Msh3</i>  | -2.08 | chr13 | MutS homolog 3                                         |
| <i>Rfc5</i>  | -2.04 | chr5  | Replication factor C (activator 1) 5                   |

---

**Table S4. Genes involved in the non-homologous end-joining (NHEJ) pathway that are down-regulated by intestinal-specific knockdown of KLF5 at 6 h after 15 Gy TBI (*Vil-Cre; Klf5<sup>fl/+</sup>* mice vs. control mice).**

| <b>Gene name</b> | <b>Fold change</b> | <b>Chromosome</b> | <b>Description</b>                     |
|------------------|--------------------|-------------------|----------------------------------------|
| <i>Nhej1</i>     | -4.51              | chr1              | Nonhomologous end-joining factor 1     |
| <i>Dclre1c</i>   | -3.13              | chr2              | DNA cross-link repair 1C, PSO2 homolog |
| <i>Rad50</i>     | -2.14              | chr11             | RAD50 homolog                          |

### **Supplemental references**

1. Takeda N, Manabe I, Uchino Y, et al. Cardiac fibroblasts are essential for the adaptive response of the murine heart to pressure overload. *J Clin Invest* 2010; 120: 254-65.
2. Wan H, Luo F, Wert SE, et al. Kruppel-like factor 5 is required for perinatal lung morphogenesis and function. *Development* 2008; 135: 2563-72.
